# Supplementary material
Source: PubMed Central journal article supplement (PMC2782670)
Supplement: NIHMS138518-supplement-1.pdf [file NIHMS138518-supplement-1.pdf]

**Interactions between lipids and voltage sensor paddles detected with tarantula toxins**

Mirela Milescu, Frank Bosmans, Seungkyu Lee, AbdulRasheed A. Alabi, Jae Il Kim and Kenton J. Swartz

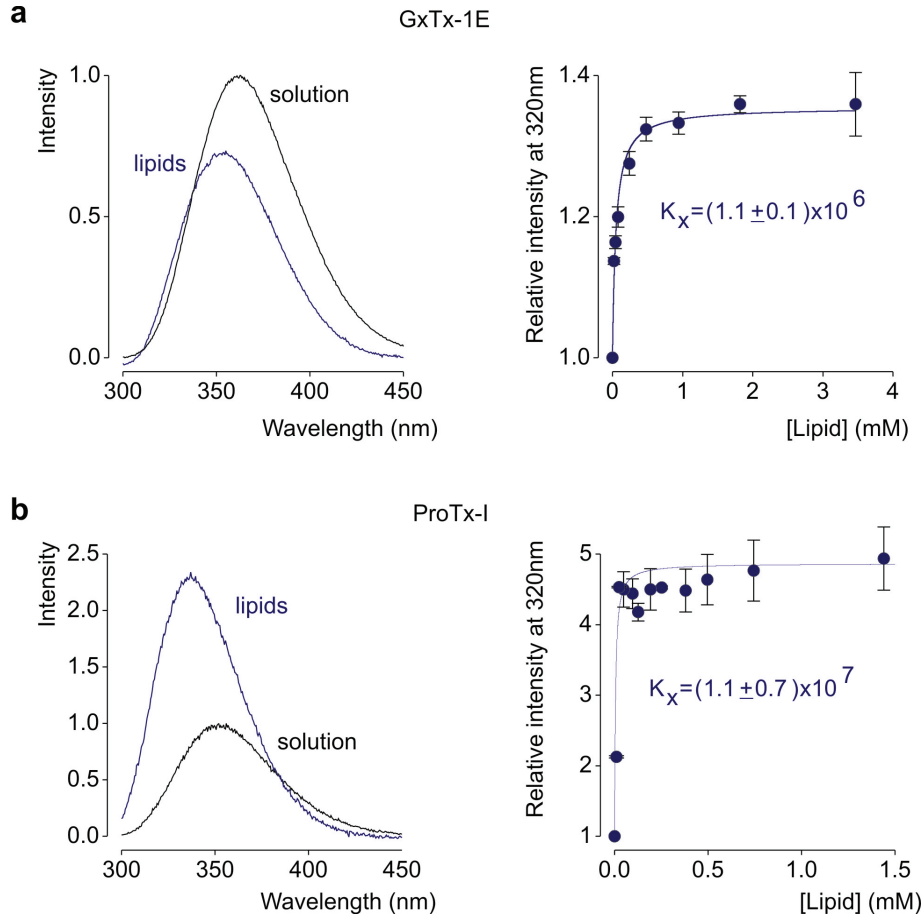

**Supplementary Figure 1 | Partitioning of GxTx-1E and ProTx-I into lipid membranes.**

Partitioning of GxTx-1E and ProTx-I into membranes was determined using tryptophan fluorescence as previously described (ref 9). Fluorescence spectra for 10  $\mu$ M toxins in 10 mM HEPES, 1 mM EDTA, pH 7.6 were recorded between 300 and 400 nm (5 nm band pass, 0° polarizer) using an excitation wavelength of 280 nm (5 nm band pass, 90° polarizer) (SPEX FluoroMax 3 spectrofluorometer) and corrected for vesicle scattering. Left Panels: Fluorescence emission spectra of GxTx-1E (**a**) and ProTx-I (**b**) in the absence (black) or presence (blue) of 3.4 mM and 1.5 mM, respectively, lipid vesicles (1:1 mix of POPC:POPG) (blue). Right Panels: Fluorescence intensity at 320 nm plotted as a function of available lipid concentration (60% of total lipids). Smooth curves correspond to fits of  $F/F_0(L) = 1 + (F/F_0^{max} - 1)K_x[L]/([W] + K_x[L])$  to the data, where  $F/F_0(L)$  is the relative increase in fluorescence intensity at 320 nm for a given concentration of lipid,  $F/F_0^{max}$  is the maximum fluorescence increase at high lipid concentrations,  $[L]$  is the average available lipid concentration (60% of total lipid concentration),  $[W]$  is the molar concentration of water (55.3 M) and  $K_x$  is the mole-fraction partitioning coefficient.  $K_x = (1.1 \pm 0.1) \times 10^6$  and  $F/F_0^{max} = 1.3 \pm 0.01$  for GxTx-1E and  $K_x = (1.1 \pm 0.7) \times 10^7$  and  $F/F_0^{max} = 4.8 \pm 0.01$  for ProTx-I.  $n=3$ , error bars are s.e.m.

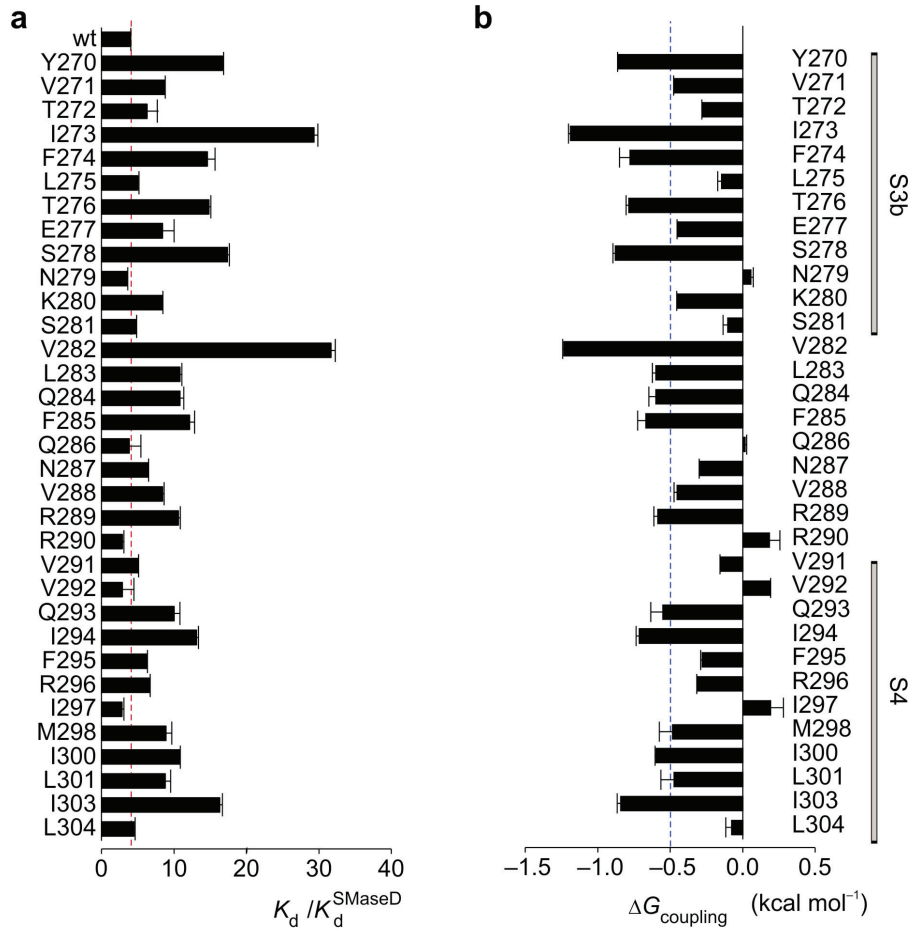

**Supplementary Figure 2 | Coupling between membrane modification and paddle mutations in the Kv2.1 channels.** **a)** Paddle mutations influence the effects of SMaseD on the apparent affinity of GxTx-1E for Kv2.1 channels. Each mutant was examined initially using a concentration of toxin near the  $K_d$  for the wild type; mutants with different  $K_d$  were further examined using a wider range of concentrations. **b)** Plot of coupling energies for interactions between paddle mutations and lipid modification.  $\Delta G = RT \ln \Omega$ , where the coupling coefficient  $\Omega = (K_d^{wt} \cdot K_d^{wtSMaseD}) / (K_d^{mut} \cdot K_d^{mtSMaseD})$ .  $n=3$ , error bars are s.e.m.

# SUPPLEMENTARY INFORMATION

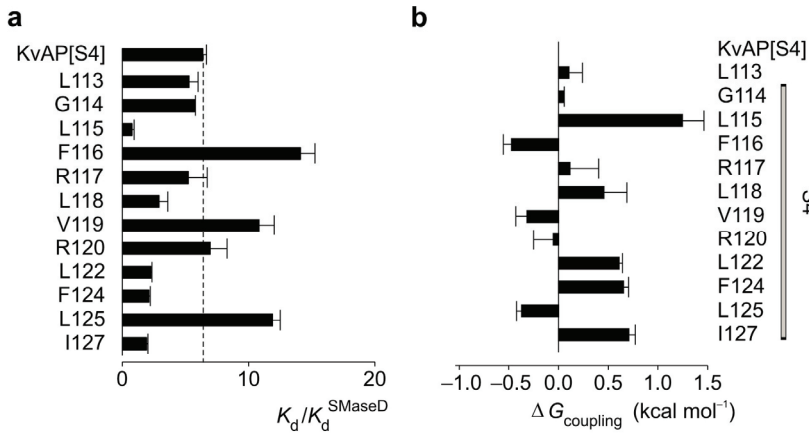

**Supplementary Figure 3| Coupling between membrane modification and paddle mutations in the KvAP[S4] chimaera.**

**a)** Ala mutations within S4 influence the effects of SMaseD on the apparent affinity of VSTx for the KvAP[S4] chimaera. n=3, error bars are s.e.m.

**b)** Plot of coupling energies for interactions between channel mutations and lipid modification. Same analysis as in Fig 3.

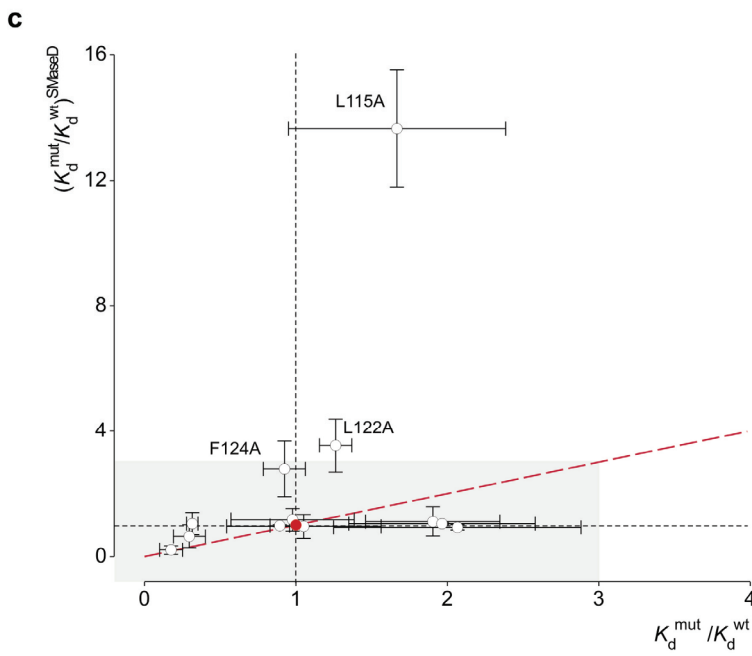

**c,d)** Comparison of the effects of KvAP[S4] mutations on VSTx affinity before and after membrane modification with SMaseD. Data from a) and Table 3. The red dotted line corresponds to the values for which no coupling is observed ( $\Omega = 1$ ).

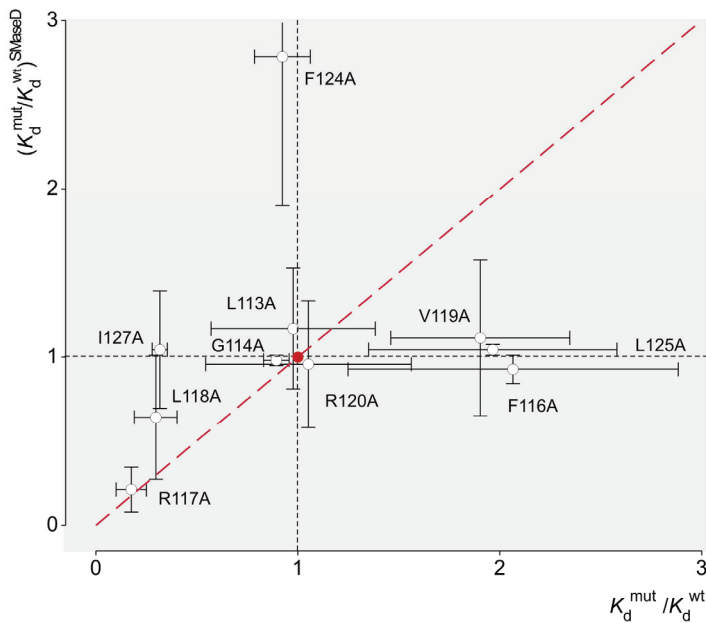

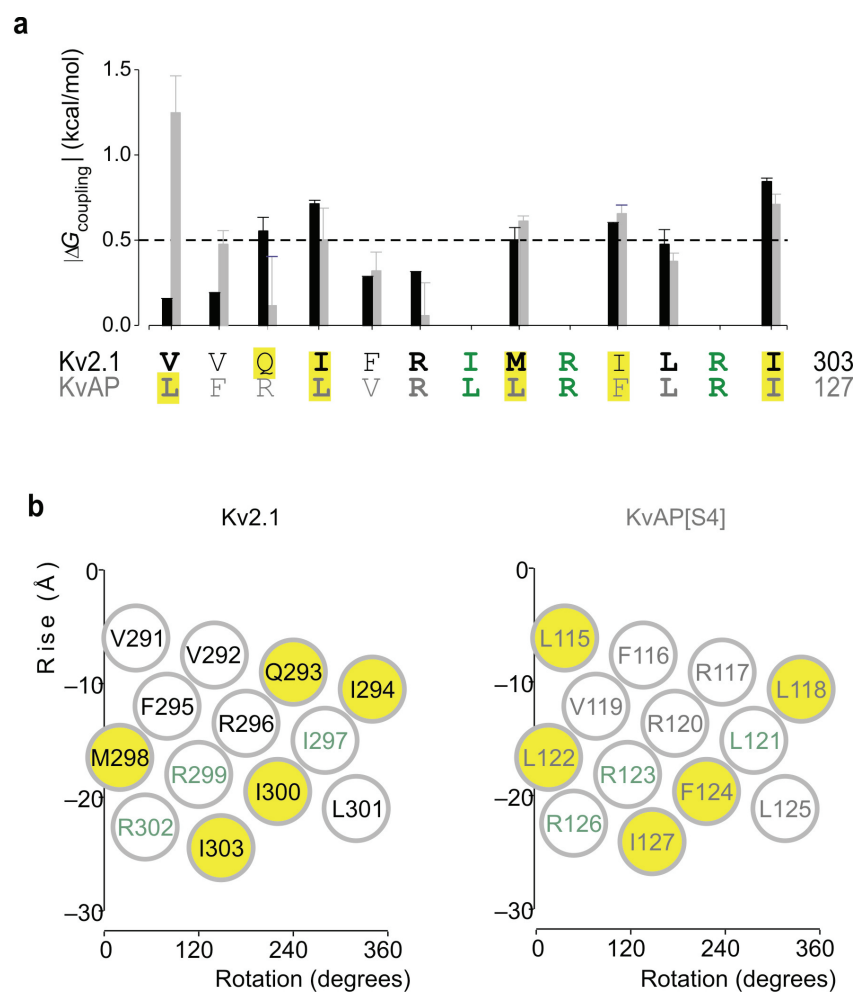

**Supplementary Figure 4 | Comparison of coupling energies for S4 helices from Kv2.1 and KvAP.**

**a)** Comparison of coupling energies for S4 Ala mutations and lipid modification for GxTx-1E interaction with Kv2.1 and VSTx1 interaction with KvAP. Data are from Fig 3 and Supplementary Fig.3. **b)** Distribution of coupling energies within S4 helices from Kv2.1 and KvAP. Yellow highlighting indicates positions where  $\Delta G_{\text{coupling}} > 0.5 \text{ kcal mol}^{-1}$ . Mutations at positions indicated with green text cause large shifts in channel activation to negative voltages ( $>60 \text{ mV}$ ), making it difficult to measure voltage-activation relationships or toxin affinities after SMaseD treatment. Only in the case of I297A in Kv2.1 (the least perturbed of these), could we obtain reliable measurements.

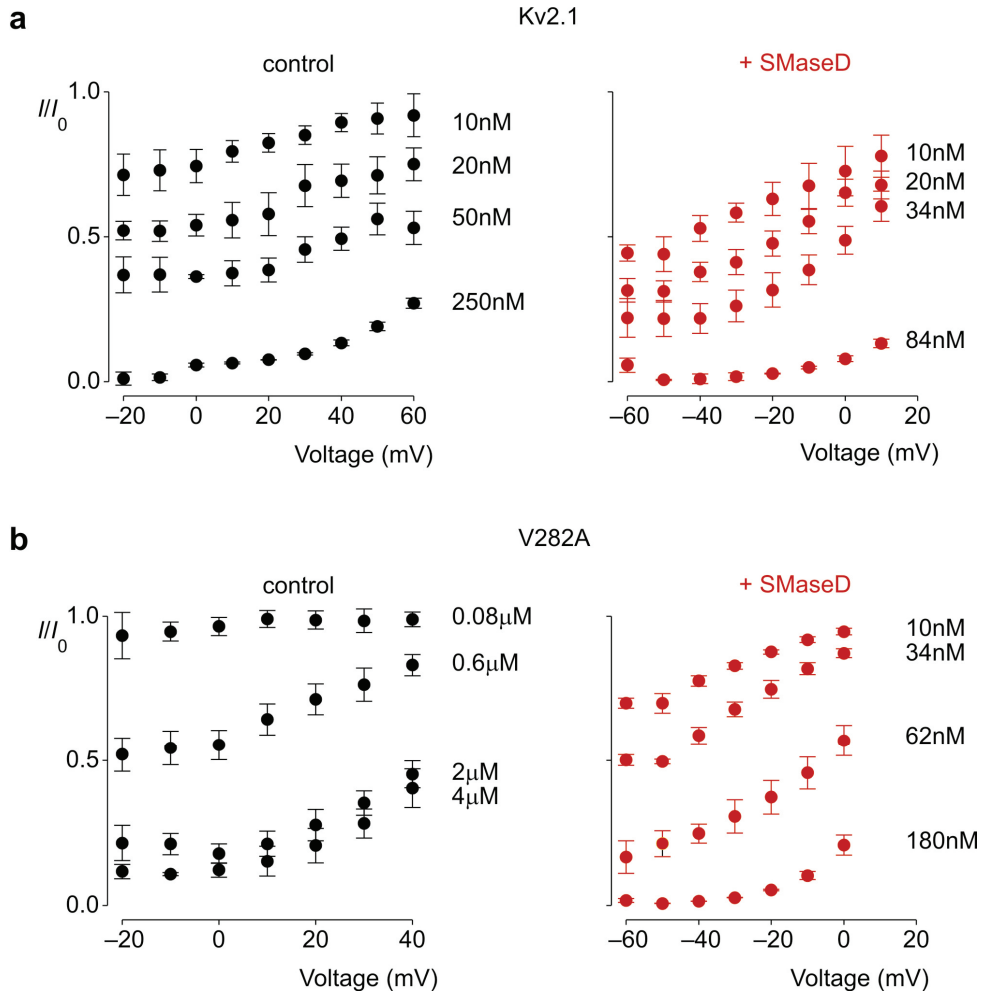

**Supplementary Figure 5 | Estimating the concentration-dependence for GxTx-1E occupancy of Kv channels.**

**a)** Fractional inhibition of Kv2.1 tail currents ( $I/I_0$ ) elicited following depolarization to the indicated voltages. The values of  $I/I_0$  measured in the plateau phase at negative voltages where toxin-bound channels do not open were taken as the fraction unbound ( $F_u$ ). Data for control membranes is shown in black symbols (left), while that following treatment with SMaseD is shown in red (right). Holding voltage is -100 mV, and tail voltage is -60 mV for control and -80 mV for SMaseD. **b)** Fractional inhibition of Kv2.1 V282A tail currents elicited following depolarization to the indicated voltages for control (black) and SMaseD-treated (red) membranes. Same voltage protocols as in a.  $n=3-5$  and errors bars are s.e.m..

## SUPPLEMENTARY INFORMATION

| Construct | $K_d$ , nM   | $K_d^{SMaseD}$ , nM |
|-----------|--------------|---------------------|
| wt        | 203 ± 38     | 52 ± 8              |
| Y270A     | 560 ± 68     | 33 ± 1              |
| V271A     | 394 ± 32     | 45 ± 1              |
| T272A     | 3900 ± 275   | 620 ± 34            |
| I273A     | 4400 ± 427   | 150 ± 21            |
| F274A     | 16800 ± 1300 | 1148 ± 425          |
| L275A     | 121 ± 32     | 30 ± 3              |
| T276A     | 20000 ± 2600 | 1350 ± 200          |
| E277A     | 30000 ± 1500 | 3570 ± 150          |
| S278A     | 5798 ± 879   | 334 ± 36            |
| N279A     | 237 ± 22     | 66 ± 10             |
| K280A     | 401 ± 32     | 48 ± 4              |
| S281A     | 6200 ± 1600  | 1322 ± 50           |
| V282A     | 3800 ± 400   | 120 ± 9             |
| L283A     | 6600 ± 1200  | 609 ± 74            |
| Q284A     | 3280 ± 313   | 303 ± 88            |
| F285A     | 3700 ± 1200  | 305 ± 12            |
| Q286A     | 1236 ± 154   | 324 ± 16            |
| N287A     | 469 ± 56     | 73 ± 5              |
| V288A     | 484 ± 68     | 57 ± 9              |
| R289A     | 2182 ± 482   | 206 ± 12            |
| R290A     | 1750 ± 566   | 607 ± 124           |
| V291A     | 543 ± 50     | 107 ± 8             |
| V292A     | 120 ± 6      | 42 ± 2              |
| Q293A     | 480 ± 72     | 48 ± 18             |
| I294A     | 942 ± 151    | 72 ± 10             |
| F295A     | 1250 ± 160   | 198 ± 6             |
| R296A     | 10000 ± 563  | 1500 ± 160          |
| I297A     | 534 ± 158    | 188 ± 56            |
| M298A     | 321 ± 84     | 36 ± 12             |
| I300A     | 656 ± 56     | 61 ± 5              |
| L301A     | 1461 ± 589   | 166 ± 20            |
| I303A     | 1337 ± 243   | 82 ± 8              |

**Table 1|**  
**Apparent  $K_d$  values for GxTx-1E interaction with Kv2.1 Ala mutants in native or SMaseD modified membranes.**

n=3, errors are s.e.m.

**SUPPLEMENTARY INFORMATION**

| Construct | - SMaseD       |           | + SMaseD       |           |
|-----------|----------------|-----------|----------------|-----------|
|           | $V_{1/2}$ , mV | z         | $V_{1/2}$ , mV | z         |
| wt        | -4 ± 1         | 2.6 ± 0.2 | -42 ± 1        | 3.3 ± 0.3 |
| Y270A     | 16 ± 3         | 1.8 ± 0.5 | -26 ± 1        | 2.1 ± 0.2 |
| V271A     | -9 ± 1         | 3.2 ± 0.5 | -50 ± 1        | 3.3 ± 0.5 |
| T272A     | -2 ± 1         | 2.5 ± 0.3 | -32 ± 1        | 2.8 ± 0.3 |
| I273A     | 7 ± 1          | 3.6 ± 0.4 | -32 ± 2        | 2.2 ± 0.3 |
| F274A     | -18 ± 1        | 2.2 ± 0.2 | -46 ± 1        | 2.9 ± 0.3 |
| L275A     | 9 ± 1          | 2.8 ± 0.3 | -32 ± 1        | 2.2 ± 0.3 |
| T276A     | 5 ± 1          | 3 ± 0.2   | -31 ± 2        | 2.7 ± 0.4 |
| E277A     | 6 ± 1          | 2 ± 0.7   | -34 ± 2        | 2 ± 0.3   |
| S278A     | -16 ± 1        | 3 ± 0.4   | -50 ± 1        | 3 ± 0.4   |
| N279A     | -11 ± 1        | 2.5 ± 0.4 | -50 ± 1        | 2 ± 0.3   |
| K280A     | -5 ± 2         | 2 ± 0.3   | -40 ± 2        | 2 ± 0.2   |
| S281A     | -1 ± 1         | 2.7 ± 0.4 | -30 ± 1        | 3 ± 0.4   |
| V282A     | -7 ± 2         | 2 ± 0.5   | -38 ± 2        | 1.8 ± 0.3 |
| L283A     | -5 ± 2         | 2.7 ± 0.7 | -41 ± 1        | 3.1 ± 0.4 |
| Q284A     | 4 ± 1          | 2.6 ± 0.1 | -25 ± 1        | 2.5 ± 0.3 |
| F285A     | -19 ± 1        | 2.5 ± 0.3 | -58 ± 1        | 2.9 ± 0.5 |
| Q286A     | -13 ± 1        | 2 ± 0.3   | -47 ± 7        | 1 ± 0.2   |
| N287A     | -9 ± 2         | 2 ± 0.3   | -47 ± 2        | 2.5 ± 0.5 |
| V288A     | 6 ± 1          | 2.6 ± 1.6 | -33 ± 2        | 3 ± 0.6   |
| R289A     | 5 ± 2          | 2.5 ± 0.6 | -27 ± 2        | 2.4 ± 0.4 |
| R290A     | -7 ± 1         | 2.5 ± 0.1 | -33 ± 1        | 2.3 ± 0.1 |
| V291A     | -9 ± 1         | 3.5 ± 0.6 | -50 ± 1        | 5.6 ± 0.7 |
| V292A     | 22 ± 2         | 3.7 ± 1   | -8 ± 2         | 1.6 ± 0.3 |
| Q293A     | 7 ± 1          | 1.6 ± 0.1 | -38 ± 1        | 2.9 ± 0.2 |
| I294A     | -11 ± 2        | 1.5 ± 0.3 | -33 ± 2        | 1.7 ± 0.8 |
| F295A     | -12 ± 2        | 1.9 ± 0.7 | -50 ± 4        | 1.7 ± 0.3 |
| R296A     | -1 ± 1         | 1.9 ± 0.1 | -33 ± 2        | 1.3 ± 0.2 |
| I297A     | -57 ± 1        | 4 ± 0.5   | -70 ± 1        | 4.8 ± 0.6 |
| M298A     | -5 ± 1         | 2.6 ± 0.6 | -39 ± 2        | 2.5 ± 0.3 |
| I300A     | -5 ± 2         | 1.6 ± 0.3 | -28 ± 2        | 1.6 ± 0.2 |
| L301A     | 9 ± 5          | 2.3 ± 0.2 | -30 ± 1        | 3.3 ± 0.4 |
| I303A     | 25 ± 1         | 3 ± 0.2   | -7 ± 1         | 2.6 ± 0.3 |

**Table 2|**  
**Gating properties of Kv2.1 Ala mutants in native or SMaseD modified membranes.**

Midpoint ( $V_{1/2}$ ) and slope (z) values were calculated by fitting a single Boltzmann function to voltage-activation relations, obtained from tail current measurements. n=3, errors are s.e.m.

## SUPPLEMENTARY INFORMATION

| Construct | - SMaseD           |                      |           | + SMaseD           |                      |           |
|-----------|--------------------|----------------------|-----------|--------------------|----------------------|-----------|
|           | $K_d, \mu\text{M}$ | $V_{1/2}, \text{mV}$ | $z$       | $K_d, \mu\text{M}$ | $V_{1/2}, \text{mV}$ | $z$       |
| KvAP[S4]  | 10.0 ± 2.5         | -12 ± 1              | 2.2 ± 0.2 | 1.6 ± 0.3          | -33 ± 3              | 2.1 ± 0.2 |
| L113      | 9.8 ± 4.1          | -29 ± 3              | 2.3 ± 0.2 | 1.8 ± 0.6          | -37 ± 1              | 2.1 ± 0.1 |
| G114      | 8.9 ± 0.6          | -12 ± 2              | 2.2 ± 0.2 | 1.6 ± 0.1          | -42 ± 1              | 2.7 ± 0.3 |
| L115      | 16.7 ± 7.2         | 22 ± 2               | 1.6 ± 0.1 | 21.6 ± 10.8        | -20 ± 1              | 1.9 ± 0.1 |
| F116      | 20.7 ± 8.2         | -30 ± 3              | 2.4 ± 0.3 | 1.5 ± 0.1          | -55 ± 1              | 2.8 ± 0.5 |
| R117      | 1.7 ± 0.8          | -14 ± 2              | 2.3 ± 0.2 | 0.3 ± 0.2          | -43 ± 1              | 3.2 ± 0.3 |
| L118      | 3.0 ± 1.1          | -10 ± 3              | 2.4 ± 0.2 | 1.0 ± 0.6          | -37 ± 1              | 2.1 ± 0.2 |
| V119      | 19.0 ± 4.4         | -24 ± 2              | 2.2 ± 0.2 | 1.8 ± 0.7          | -50 ± 2              | 1.8 ± 0.2 |
| R120      | 10.5 ± 5.1         | 11 ± 2               | 2.4 ± 0.1 | 1.5 ± 0.6          | -30 ± 1              | 2.2 ± 0.2 |
| L122      | 12.6 ± 1.1         | -13 ± 1              | 2.7 ± 0.2 | 5.6 ± 1.4          | -35 ± 1              | 1.8 ± 0.2 |
| F124      | 9.2 ± 0.4          | -50 ± 3              | 2.3 ± 0.3 | 4.4 ± 1.4          | -77 ± 2              | 2.3 ± 0.4 |
| L125      | 19.6 ± 6.1         | -9 ± 1               | 2.2 ± 0.2 | 1.7 ± 0.1          | -37 ± 3              | 1.6 ± 0.2 |
| I127      | 3.2 ± 0.4          | -8 ± 1               | 2.4 ± 0.2 | 1.7 ± 0.5          | -34 ± 1              | 2.8 ± 0.2 |

**Table 3|**  
**Apparent  $K_d$  values for VSTx and gating properties of KvAP[S4] Ala mutants in native or SMaseD modified membranes.**

Midpoint ( $V_{1/2}$ ) and slope ( $z$ ) values were calculated by fitting a single Boltzmann function to voltage-activation relations, obtained from tail current measurements.  $n=3$ , errors are s.e.m.
